# Supplementary material for: Global and Northern-High-Latitude Terrestrial carbon sinks in the 21st century from CMIP6 experiments
Source: Copernicus journal article supplement (doi:10.5194/egusphere-2022-417), 2022-06-07
Supplement: Supplementary file 1 [file egusphere-2022-417-supplement.pdf]

*Earth System Dynamics*

Supplementary material for

**Global and Northern-High-Latitude Terrestrial carbon sinks in the 21st century from  
CMIP6 experiments**

Han Qiu<sup>1,2</sup>, Dalei Hao<sup>2</sup>, Yelu Zeng<sup>1</sup>, Xuesong Zhang<sup>3</sup>, Min Chen<sup>1,4</sup>

1. Department of Forest and Wildlife Ecology, University of Wisconsin-Madison, 1630 Linden Drive, Madison, WI, USA
2. Atmospheric Sciences and Global Change Division, Pacific Northwest National Laboratory, Richland, WA, USA
3. USDA-ARS Hydrology and Remote Sensing Laboratory, Beltsville, MD 20705-2350, USA
4. Center for Climatic Research, Nelson Institute, University of Wisconsin-Madison

**Contents of this file**

Figures S1 to S6

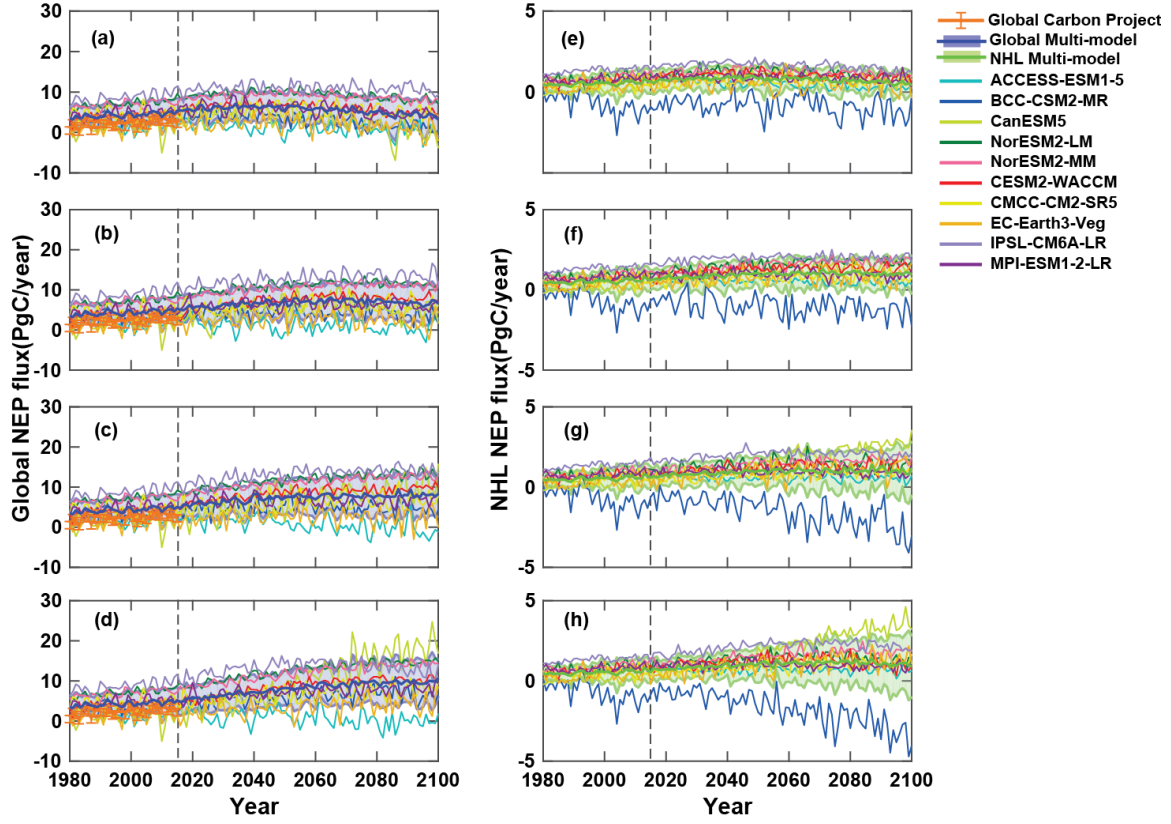

**Figure S1.** Time series of ten CMIP6 models NEP outputs during the historical period (1980-2014) and the future period (2015 - 2100) under four future scenarios at the global and the NHL scales: (a) global NEP under SSP126; (b) global NEP under SSP245; (c) global NEP under SSP370; (d) global NEP under SSP585; (e) NHL NEP under SSP126; (f) NHL NEP under SSP245; (g) NHL NEP under SSP370; (h) NHL NEP under SSP585. The shaded bands are the SD values among models representing the model uncertainties.

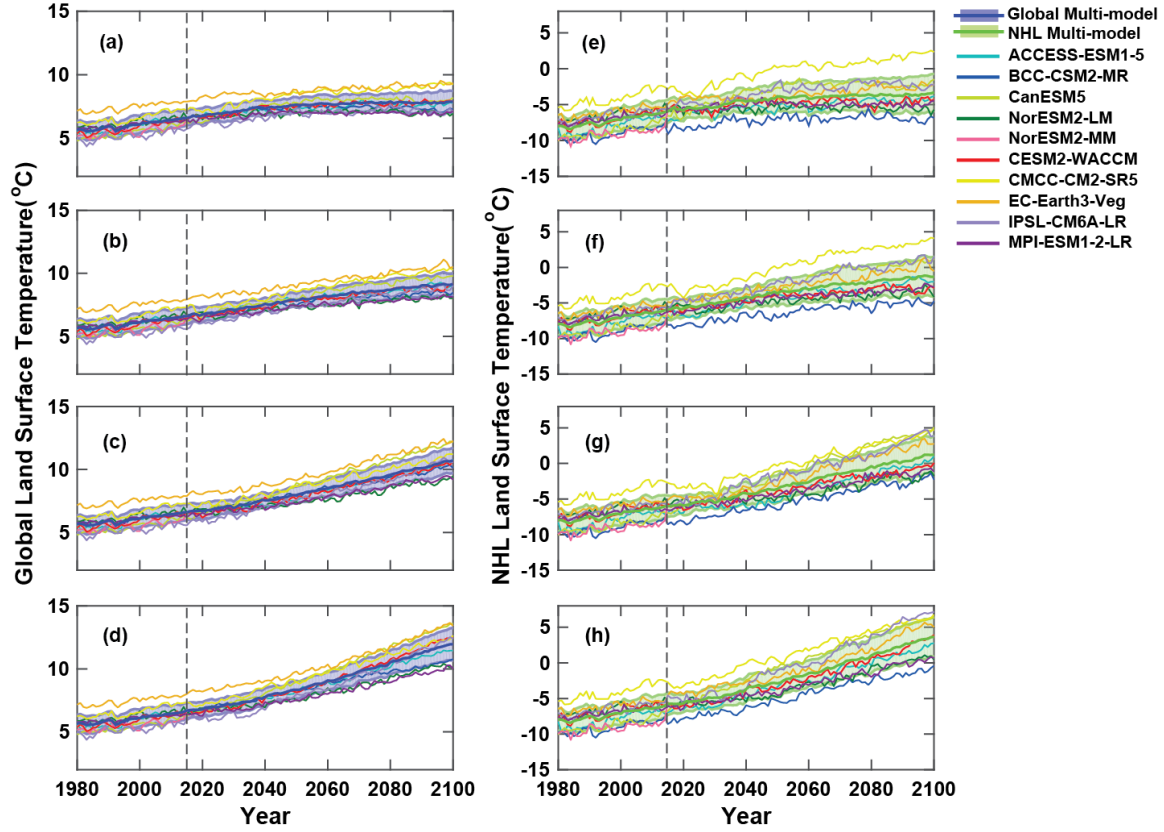

**Figure S2.** Time series of ten CMIP6 models TS outputs during the historical period (1980-2014) and the future period (2015 - 2100) under four future scenarios at the global and the NHL scales: (a) global TS under SSP126; (b) global TS under SSP245; (c) global TS under SSP370; (d) global TS under SSP585; (e) NHL TS under SSP126; (f) NHL TS under SSP245; (g) NHL TS under SSP370; (h) NHL TS under SSP585. The shaded bands are the SD values among models representing the model uncertainties.

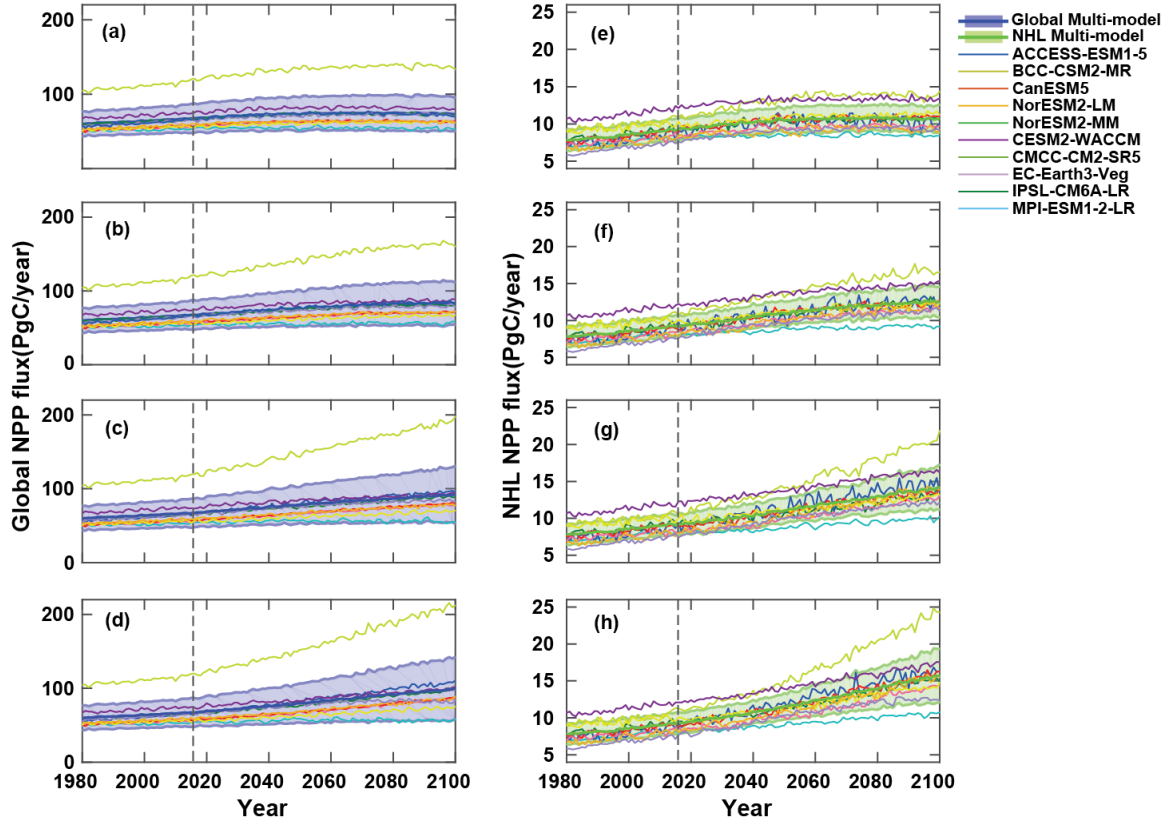

**Figure S3.** Time series of ten CMIP6 models NPP outputs during the historical period (1980-2014) and the future period (2015 - 2100) under four future scenarios at the global and the NHL scales: (a) global NPP under SSP126; (b) global NPP under SSP245; (c) global NPP under SSP370; (d) global NPP under SSP585; (e) NHL NPP under SSP126; (f) NHL NPP under SSP245; (g) NHL NPP under SSP370; (h) NHL NPP under SSP585. The shaded bands are the SD values among models representing the model uncertainties.

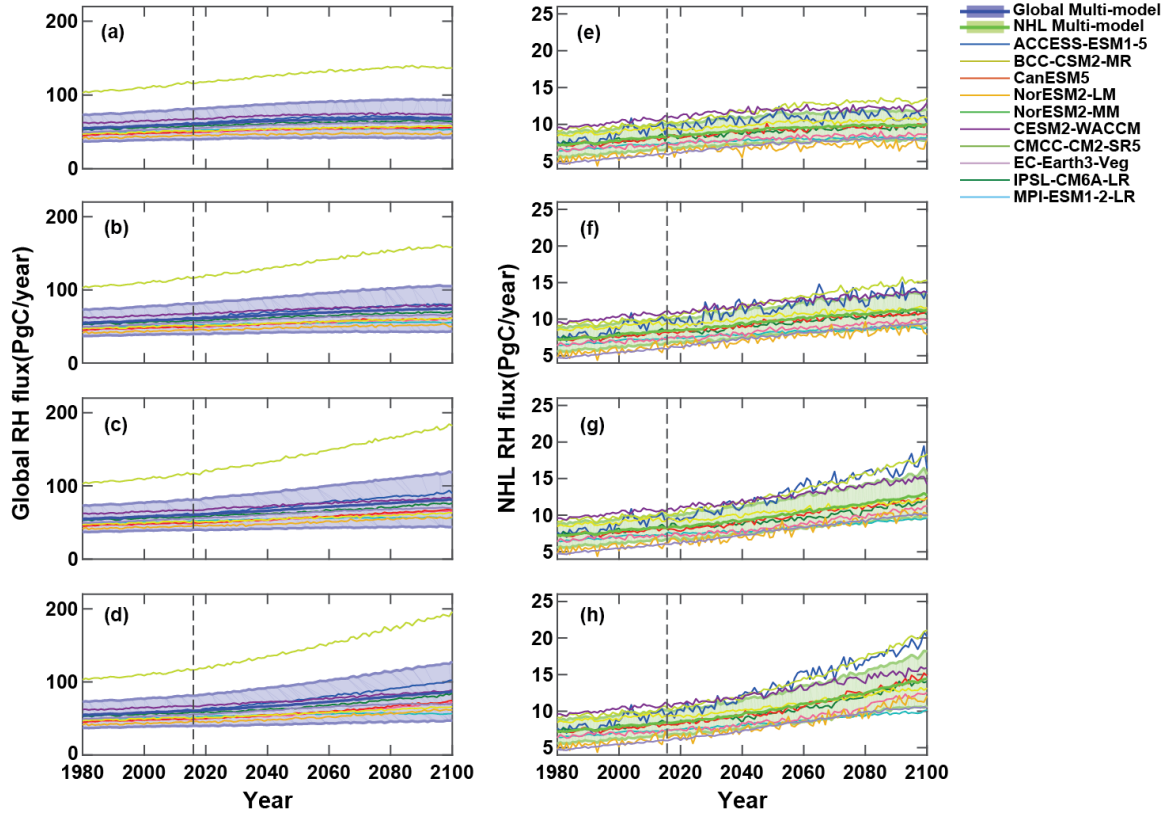

**Figure S4.** Time series of ten CMIP6 models RH outputs during the historical period (1980-2014) and the future period (2015 - 2100) under four future scenarios at the global and the NHL scales: (a) global RH under SSP126; (b) global RH under SSP245; (c) global RH under SSP370; (d) global RH under SSP585; (e) NHL RH under SSP126; (f) NHL RH under SSP245; (g) NHL RH under SSP370; (h) NHL RH under SSP585. The shaded bands are the SD values among models representing the model uncertainties.

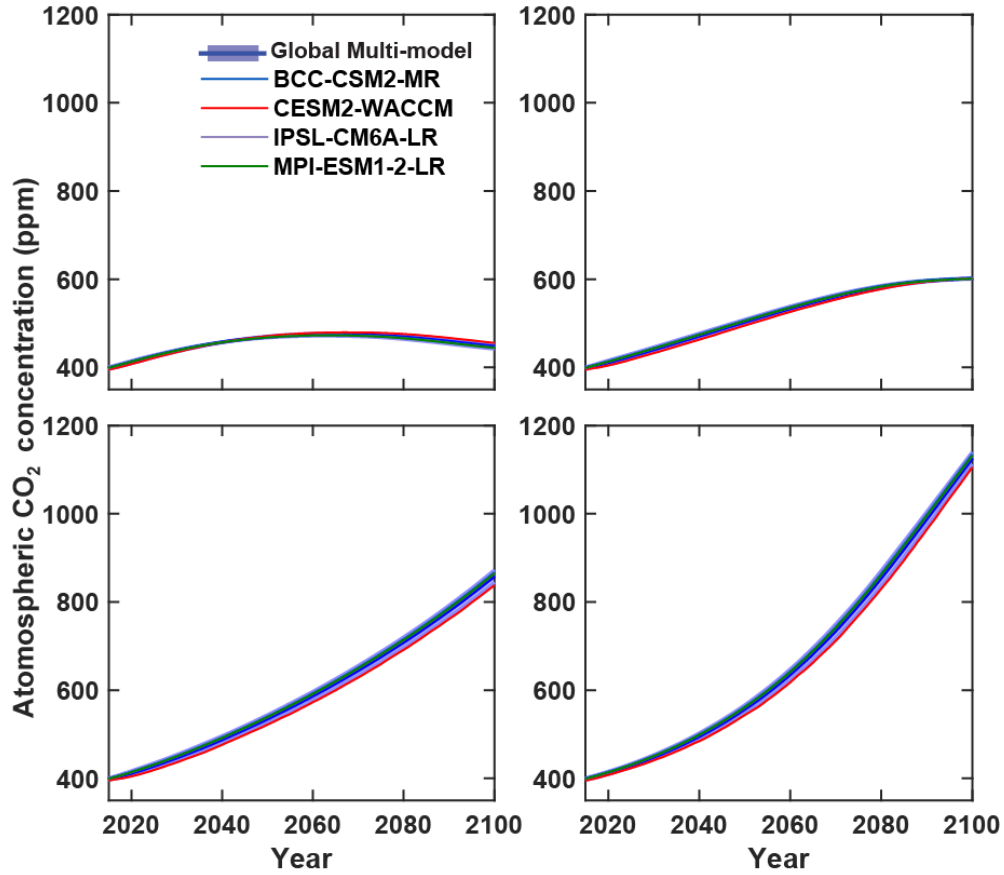

**Figure S5.** Time series of four CMIP6 models bottom layer global atmospheric CO<sub>2</sub> concentration outputs during the future period (2015 - 2100) under four future scenarios at the global scale: (a) global CO<sub>2</sub> under SSP126; (b) global CO<sub>2</sub> under SSP245; (c) global CO<sub>2</sub> under SSP370; (d) global CO<sub>2</sub> under SSP585. The shaded bands are the SD values among models representing the model uncertainties.

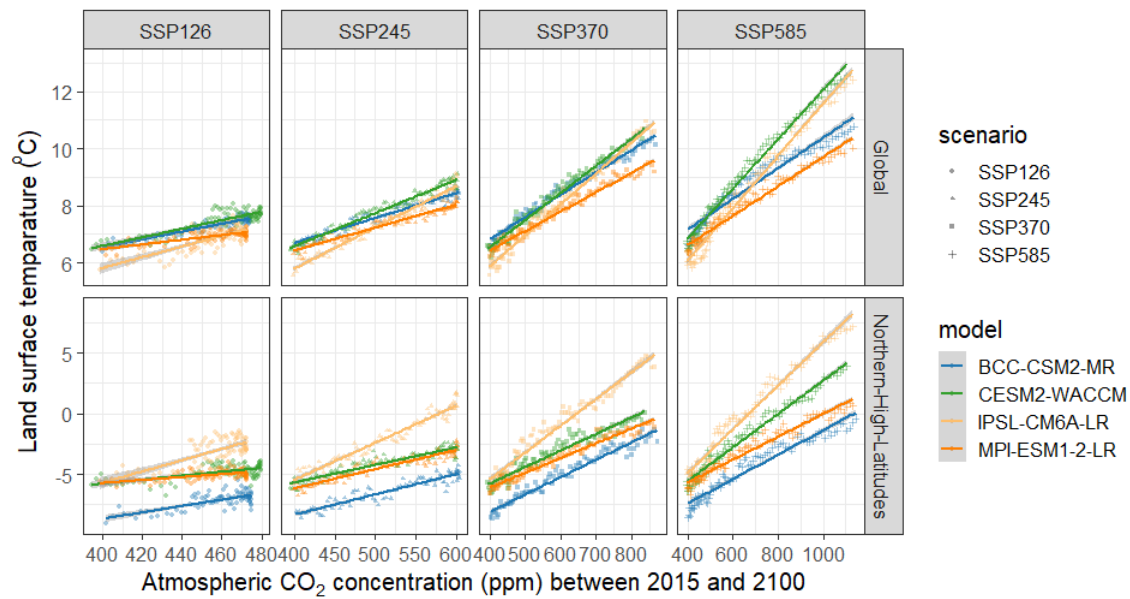

**Figure S6.** Land surface temperature (°C) vs. atmospheric CO<sub>2</sub> concentration (ppm) in four CMIP6 models during the future period (2015 - 2100) under four future scenarios at the global and the NHL scales.
